# Supplementary material for: Thirty‐Day Readmission After Infective Endocarditis: Analysis From a Nationwide Readmission Database
Source: PubMed Central journal article supplement — J Am Heart Assoc. 2019 Apr 25;8(9):e011598. doi: 10.1161/JAHA.118.011598 (PMC6512130; doi:10.1161/jaha.118.011598), 2019-04-25

# **SUPPLEMENTAL MATERIAL**

**Table S1.** International Classification of Diseases, Ninth Edition, Clinical Modification,

Elixhauser Comorbidity Software, and Clinical Classification Software were used to identify patient/hospital characteristics.

| Variable                 | Source                 | Code                                                                                      |
|--------------------------|------------------------|-------------------------------------------------------------------------------------------|
| Bacteria                 |                        |                                                                                           |
| <i>Staphylococcus</i>    | ICD9-CM                | 03811, 03812, 04111, 04112, 0381,<br>03810, 03819, 0411, 04110, 04119                     |
| <i>Streptococcus</i>     | ICD9-CM                | 0380, 0382, 0410, 04100, 04101,<br>04102, 0174103, 04104, 04105,<br>04109                 |
| Gram-negative bacteria   | ICD9-CM                | 04185, 0384, 03840, 03841,<br>03842, 03843, 03844, 03849,<br>0413, 0414, 0415, 0416, 0417 |
| Fungi                    | ICD9-CM                | 1160, 1154, 11281                                                                         |
| Comorbidities            |                        |                                                                                           |
| Hypertension             | Elixhauser comorbidity | HTN_C                                                                                     |
| Smoking history          | ICD9-CM                | V1582, 3051                                                                               |
| Congestive heart failure | Elixhauser comorbidity | CHF                                                                                       |

|                           |                        |                                                                                              |
|---------------------------|------------------------|----------------------------------------------------------------------------------------------|
| Diabetes                  | Elixhauser comorbidity | DM, DMCX                                                                                     |
| Renal failure             | Elixhauser comorbidity | RENLFAIL                                                                                     |
| Atrial fibrillation       | ICD9-CM                | 42731                                                                                        |
| Chronic pulmonary disease | Elixhauser comorbidity | CHRNLUNG                                                                                     |
| Coagulopathy              | Elixhauser comorbidity | COAG                                                                                         |
| Peripheral artery disease | Elixhauser comorbidity | PERIVASC                                                                                     |
| Depression                | Elixhauser comorbidity | DEPRESS                                                                                      |
| Obesity                   | Elixhauser comorbidity | OBESE                                                                                        |
| Hypothyroidism            | Elixhauser comorbidity | HYPOTHY                                                                                      |
| Prior stroke/TIA          | ICD9-CM                | V1254                                                                                        |
| Prior MI                  | ICD9-CM                | 412                                                                                          |
| In-hospital outcomes      |                        |                                                                                              |
| Acute renal failure       | ICD9-CM                | 5845-5849                                                                                    |
| Valvular surgery          | CCS Procedures         | 43                                                                                           |
| Pulmonary embolism        | ICD9-CM                | 41511, 41512, 41513, 41519                                                                   |
| Acute CI/TIA              | ICD9-CM                | 43301, 43311, 43321, 43331,<br>43381, 43391, 43401, 43411,<br>43491, 4350, 4351, 4352, 4353, |

|                         |                |                                 |
|-------------------------|----------------|---------------------------------|
|                         |                | 4358, 4359, 436                 |
| Systemic embolism       | CCS Diagnoses  | 116                             |
| Cardiogenic shock       | ICD9-CM        | 78551                           |
| PM/ICD implantation     | CCS Procedures | 48                              |
| Intracranial hemorrhage | ICD9-CM        | 430, 431, 432, 4320, 4321, 4329 |
| Cardiac arrest          | ICD9-CM        | 4275                            |

ICD9-CM, International Classification of Diseases, Ninth Edition, Clinical Modification; TIA, transient ischemic attack; MI, myocardial infarction; CI, cerebral infarction; PM, pacemaker; ICD, Implantable Cardioverter Defibrillator

**Figure S1. Kaplan-Meier Curve of 30-day readmissions after infective endocarditis.**

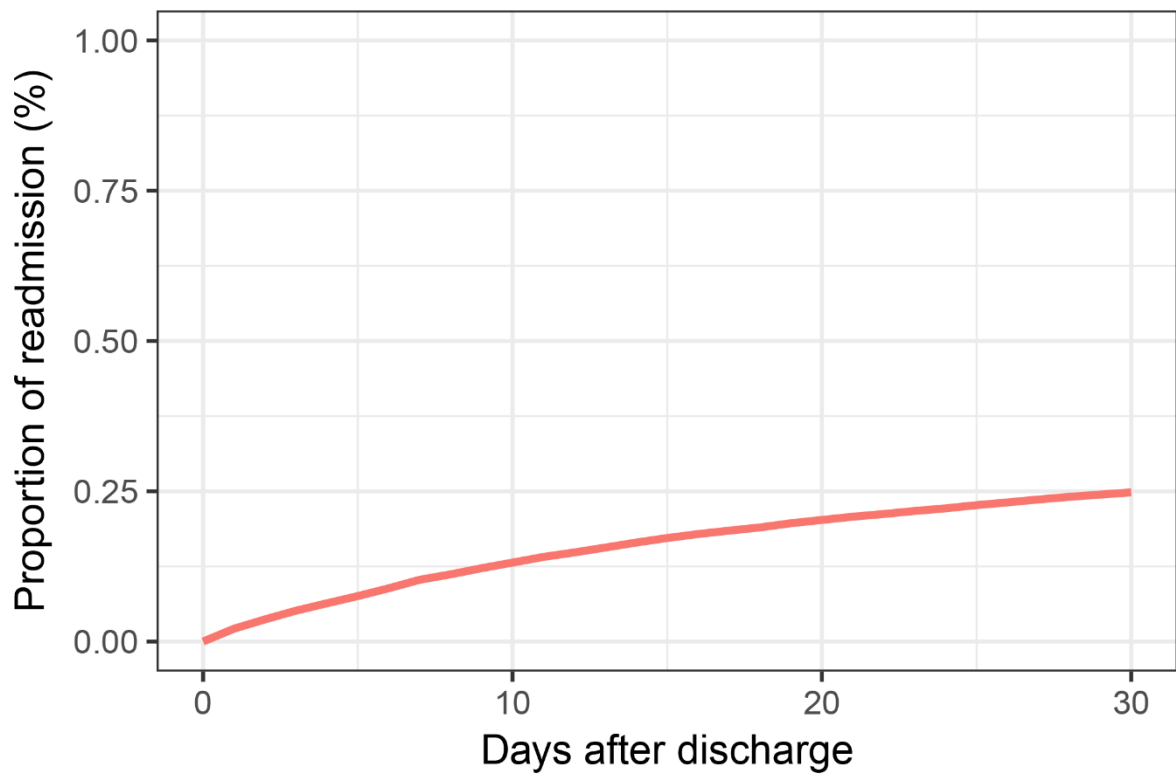

**Figure S2. Estimated mean costs of index admissions and 30-day readmissions after infective endocarditis.**

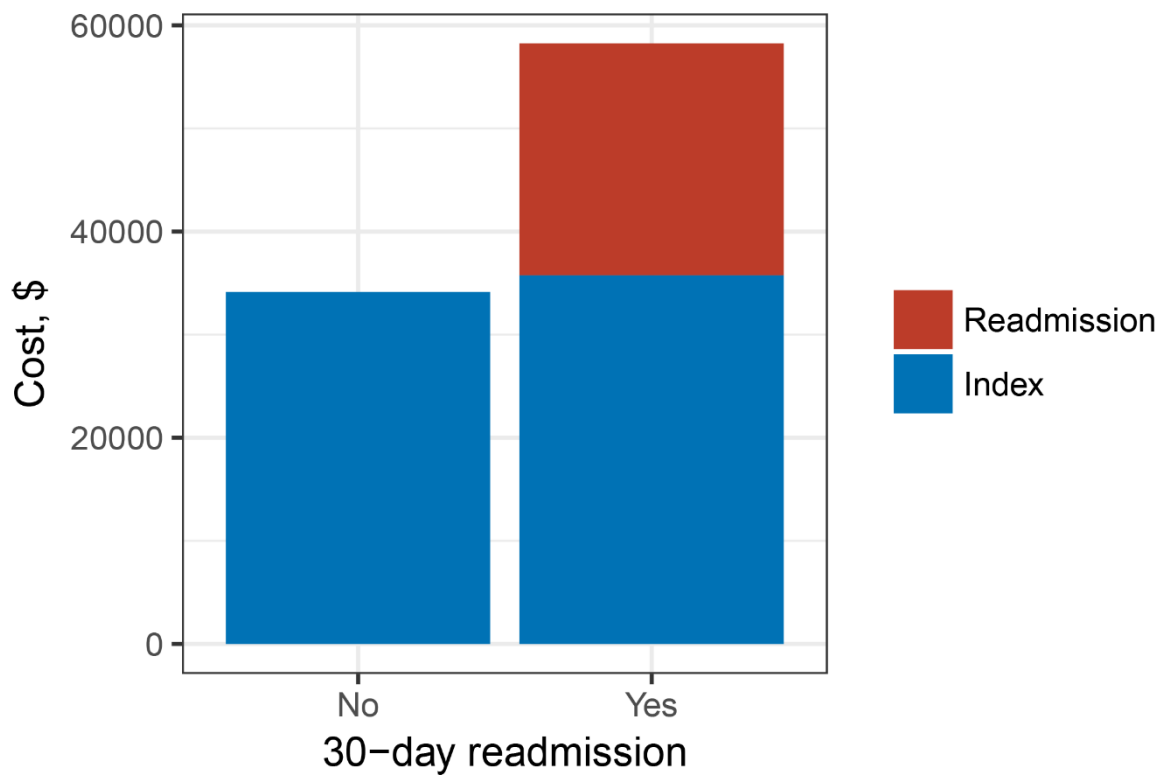

Supplement: JAH3-8-e011598-s001.pdf [file JAH3-8-e011598-s001.pdf]
